# Supplementary material for: Hydrogel-Based Fluorescent Dual pH and Oxygen Sensors Loaded in 96-Well Plates for High-Throughput Cell Metabolism Studies
Source: MDPI journal article supplement (doi:10.3390/s18020564), 2018-02-13
Supplement: s1 [file s1]

## Supporting Information

# Hydrogel-based Fluorescent Dual pH and Oxygen Sensors Loaded in 96-well Plates for High-throughput Cell Metabolism Studies

Shanshan Wu <sup>1,2,†</sup>, Siying Wu <sup>1,†</sup>, Zheyuan Yi <sup>1</sup>, Fei Zeng <sup>1</sup>, Weizhen Wu <sup>1</sup>, Yuan Qiao <sup>1</sup>, Xingzhong Zhao <sup>2</sup>, Xing Cheng <sup>1,\*</sup> and Yanqing Tian <sup>1,\*</sup>

<sup>1</sup> Department of Materials Science and Engineering, Southern University of Science and Technology, No 1088 Xueyuan Road, Xili, Nanshan District, Shenzhen, Guangdong, 518055, China; cheng.x@sustc.edu.cn; tianyq@sustc.edu.cn

<sup>2</sup> Department of Physics, Wuhan University, Wuhan, Hubei Province 430072, China

\* Correspondence: tianyq@sustc.edu.cn; Tel.: +0755-88018997

† equal contributors.

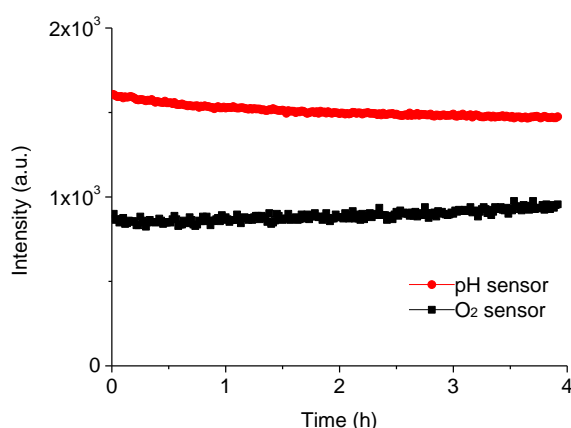

**Figure S1.** The photostability of O<sub>2</sub> sensor and pH sensor. Emission intensity of oxygen probes was monitored at 645 nm with an excitation of 405 nm; emission intensity of pH probes was monitored at 525 nm with an excitation of 488 nm.

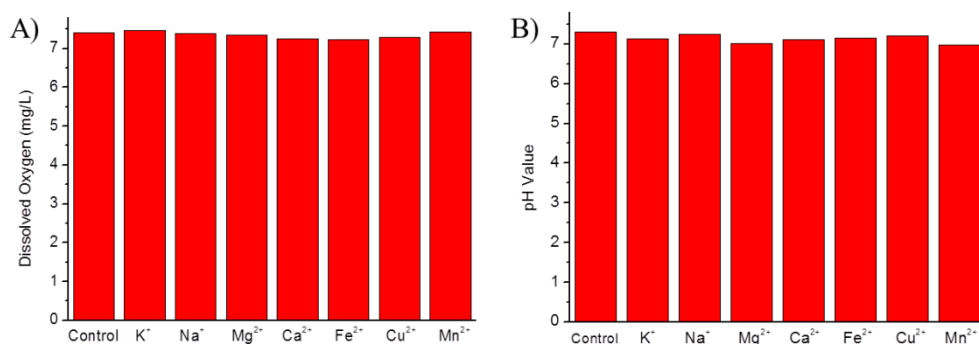

**Figure S2** dissolved oxygen changes (A), and pH changes (B) for the sensing films in the presence of various biological cations at their physiological concentrations in B.R. buffer (pH 7.4): KCl (5.0 mM), NaCl (15 mM), MgSO<sub>4</sub> (2.5 mM), CaCl<sub>2</sub> (0.5 mM), FeCl<sub>2</sub> (18 mM), CuCl<sub>2</sub> (16 mM) and MnCl<sub>2</sub> (0.9 mM).
